# Supplementary material for: Excessive copper impairs intrahepatocyte trafficking and secretion of selenoprotein P
Source: PubMed Central journal article supplement (PMC10264388; doi:10.1038/s41467-023-39245-3), 2023-06-13
Supplement: 41467_2023_39245_MOESM3_ESM.pdf [file 41467_2023_39245_MOESM3_ESM.pdf]

## **Description of Additional Supplementary Files**

**Supplementary Data 1:** Secretome proteomics data of copper-stimulated HepG2 cells compared to cells without copper. t-Test-based, two-sided statistics were applied on normalized and logarithmized protein ratios to extract the significantly regulated proteins.
